# Supplementary material for: Parents' Knowledge and Attitudes on Pediatric Short Stature in Children Aged 2–14 Years
Source: Research Square preprint supplement (doi:10.21203/rs.3.rs-6292596/v1), 2025-05-09
Supplement: Supplementary file 1 [file 6cdd0476b4c54800c99827d8.docx]

| Dear Parents/Guardians,  We are researchers from the Shanghai Children's Medical Center Guizhou Hospital. We sincerely invite you to participate in our study titled **"A Knowledge, Attitude, and Practice (KAP) Survey Among Parents/Guardians of 2-14-Year-Old Children Regarding Pediatric Short Stature."** This study aims to understand parents' knowledge, attitudes, and practices related to pediatric short stature, providing a basis for developing scientific intervention strategies. By participating, you will contribute to improving the physical health of many individuals in the future. Participation in this study is voluntary. The study has been reviewed and approved by the hospital's Ethics Review Committee. If you agree to participate, please refer to the following instructions:  1. Please complete the questionnaire. There are no right or wrong answers; simply answer based on your actual situation. If you encounter any questions during the process, feel free to ask us. Once completed, please submit it promptly.  2. This study involves a simple questionnaire survey and will not cause harm to your physical or mental health. However, it includes some personal information, such as your gender and age. We will strictly protect your privacy and ensure that your information is kept confidential, so please feel free to fill it out.  3. As a participant, you may access information about the study and its progress at any time. If you decide to withdraw from the study, please let us know. Your data will not be included in the research results.  Finally, we sincerely thank you for taking the time to support our scientific research!  □I have been informed and agree to the use of the collected data for scientific research.  Informed Consent Signature：  **Date of Participation:** ____ Year ____ Month ____ Day |
| --- |

| **Part 1 Basic Information** | | |
| --- | --- | --- |
| **1. Your gender：** | a. Male | b. Female |
| **2. Your age： years old（please enter an integer）** | | |
| **3. Place of residence：** | a. Rural  b. Urban  c. Suburban | |
| **4. Marital status：** | a. Married  b. Divorced  c. Widowed | |
| **5. Education level：** | a. Primary school or below b. Middle school c. High school/technical school d. Associate degree e. Bachelor's degree f. Master's degree or above | |
| **6. Spouse’s education level：** | a. Primary school or below b. Middle school c. High school/technical school d. Associate degree e. Bachelor's degree f. Master's degree or above | |
| **7. Current employment status：** | a. Employed with a fixed job b. Unemployed or without a fixed job | |
| **8.** **Over the past year, your household's average monthly income per person (including in-kind and rental income): ____ yuan** | a.<2000  b.2000-4999  c.5000-9999  d.10000-19999  e.≥20000 | |
| **9.** **Number of children you have: ____ (please enter an integer)** | | |
| **10.** **Has any of your children been diagnosed with short stature?** | a. Yes  b. No | |

| **Part 2 Knowledge About Short Stature** | | | |
| --- | --- | --- | --- |
| **K1.** **Do you know what "pediatric short stature" is?** | a. Never heard of it / don’t know  b. Have heard of it but don’t know the criteria  c. Familiar | | | |
| **K2.** **Do you know what a growth chart is and how to read it?** | a. Never heard of it / don’t know  b. Have heard of it but don’t know the criteria  c. Familiar | | | |
| **K3.** **Do you know what bone age is?** | a. Never heard of it / don’t know  b. Have heard of it but don’t know the criteria  c. Familiar | | | |
| **K4.** **There are many causes of pediatric short stature. Are you aware of the following common causes?** |  |  |  | |
| **K4.1 Endocrine hormone secretion abnormalities, such as insufficient growth hormone secretion, hypothyroidism, precocious puberty, or excessive adrenal corticosteroid secretion:** | a. Never heard of it | b. Know a little about it | c. Know all of the above | |
| **K4.2 Skeletal development disorders, including achondroplasia or osteogenesis imperfecta:** | a. Never heard of it | b. Know a little about it | c. Know all of the above | |
| **K4.3 Malnutrition or metabolic disorders due to chronic illnesses, malnutrition, diabetes insipidus, or diabetes:** | a. Never heard of it | b. Know a little about it | c. Know all of the above | |
| **K4.4 Mental disorders: Recent studies suggest that mental disorders can affect height, also known as psychosocial dwarfism:** | a. Never heard of it | b. Know a little about it | c. Know all of the above | |
| **K4.5 Chromosomal abnormalities, such as Down syndrome or Turner syndrome:** | a. Never heard of it | b. Know a little about it | c. Know all of the above | |
| **K5.** **If pediatric short stature is not diagnosed and treated in time, it may affect a child's physical functions and psychological health:** | a. Never heard of it | b. Know a little about it | c. Know all of the above | |
| **K6.** **Diagnosing short stature requires comprehensive physical exams, blood tests, and imaging studies:** | a. Never heard of it | b. Know a little about it | c. Know all of the above | |
| **K7.** **For short stature with identified causes, treatment should address the underlying cause. For idiopathic short stature, growth hormone therapy is one effective method to stimulate growth hormone secretion and promote growth:** | a. Never heard of it | b. Know a little about it | c. Know all of the above | |
| **K8.** **Pediatric short stature refers to a height that is more than one standard deviation below the average height of healthy children of the same age, sex, and ethnicity, or below the 2nd percentile:** | a. True | b. False | c. Unsure | |
| **K9.** **If the cause of short stature is unknown, it is called idiopathic short stature:** | a. True | b. False | c. Unsure | |
| **K10.** **Sleep is closely related to children’s growth and development:** | a. True | b. False | c. Unsure | |

| **Part 3 Attitudes Towards Short Stature** | | | | | |
| --- | --- | --- | --- | --- | --- |
| **A1.My level of concern about my child’s height:** | a. Very concerned | b. Fairly concerned | c. Neutral | d. Slightly unconcerned | e. Not concerned at all |
| **A2.I believe it is very important for children to maintain a normal height level:** | a. Very concerned | b. Fairly concerned | c. Neutral | d. Slightly unconcerned | e. Not concerned at all |
| **A3.Short stature does not affect a child's character or intelligence. We should focus more on the child’s inner qualities:** | a. Very concerned | b. Fairly concerned | c. Neutral | d. Slightly unconcerned | e. Not concerned at all |
| **A4.Short stature may result from acquired factors as well as congenital ones. Therefore, if a child has short stature, parents should actively identify the causes and seek improvement:** | a. Very concerned | b. Fairly concerned | c. Neutral | d. Slightly unconcerned | e. Not concerned at all |
| **A5.Parental genes are one of the factors affecting a child's height. If my child has short stature, I would feel very guilty:** | a. Very concerned | b. Fairly concerned | c. Neutral | d. Slightly unconcerned | e. Not concerned at all |
| **A6.Short children may face rejection and discrimination from peers, affecting their social and emotional development. Therefore, parents should pay attention, seek timely treatment, and provide encouragement:** | a. Very concerned | b. Fairly concerned | c. Neutral | d. Slightly unconcerned | e. Not concerned at all |
| **A7.Ensuring adequate sleep is essential for preventing short stature:** | a. Very concerned | b. Fairly concerned | c. Neutral | d. Slightly unconcerned | e. Not concerned at all |
| **A8.Short stature in children is mainly due to calcium and zinc deficiencies. Nutritional supplementation alone is sufficient, and there’s no need for hospital examinations:** | a. Very concerned | b. Fairly concerned | c. Neutral | d. Slightly unconcerned | e. Not concerned at all |
| **A9.During a child’s growth and development, parents should focus on nutrition and exercise to provide an environment conducive to growth:** | a. Very concerned | b. Fairly concerned | c. Neutral | d. Slightly unconcerned | e. Not concerned at all |
| **A10.During a child’s growth and development, parents should also pay attention to the child’s mental health:** | a. Very concerned | b. Fairly concerned | c. Neutral | d. Slightly unconcerned | e. Not concerned at all |
| **A11.Parents should understand some knowledge about short stature to identify if their child’s height is within a normal range:** | a. Very concerned | b. Fairly concerned | c. Neutral | d. Slightly unconcerned | e. Not concerned at all |

| **Part 4 Practices Regarding Short Stature** | | | | | |
| --- | --- | --- | --- | --- | --- |
| **P1.** **I regularly measure my child’s height to monitor their growth:** | a. strongly agree | b. agree | c. neutral | d. disagree | e. strongly disagree |
| **P2.** **If my child is significantly shorter than peers of the same age, I would take them to a doctor for consultation:** | a. strongly agree | b. agree | c. neutral | d. disagree | e. strongly disagree |
| **P3.** **My child’s daily outdoor activity time is:** | a. <30 minutes b. 30–59 minutes c. 1–2 hours d. >2 hours e. Unsure | | | | |
| **P4.** **I focus on my child’s nutrition, ensuring a diverse and balanced diet that provides essential nutrients:** | a. strongly agree | b. agree | c. neutral | d. disagree | e. strongly disagree |
| **P5.** **I pay attention to my child’s sleep quality and duration:** | a. strongly agree | b. agree | c. neutral | d. disagree | e. strongly disagree |
| **P6.** **I adopt a calm and rational attitude towards my child’s height issues to avoid causing them stress or anxiety:** | a. strongly agree | b. agree | c. neutral | d. disagree | e. strongly disagree |
| **P7.** **I actively seek knowledge about normal growth and development and short stature in children:** | a. strongly agree | b. agree | c. neutral | d. disagree | e. strongly disagree |
| **P8.** **Through which channels do you learn about short stature? (Multiple selections allowed):** | a. Relatives and friends b. Healthcare professionals c. Internet (webpages, WeChat, etc.) d. Television e. Radio f. Magazines and newspapers g. Have never actively sought information h. Others (please specify) _______ | | | | |
