# Supplementary material for: Parents' Knowledge and Attitudes on Pediatric Short Stature in Children Aged 2–14 Years
Source: Research Square preprint supplement (doi:10.21203/rs.3.rs-6292596/v1), 2025-05-09
Supplement: Supplementary file 2 [file a3163d7548931fd8c3e708c9.docx]

**Table S1. Distribution of knowledge dimension responses**

| **Knowledge** | **N(%)** | | |
| --- | --- | --- | --- |
| **Never heard of it/ don’t know** | **Have heard of it but don’t know the criteria** | **Familiar** |
| **K1.** **Do you know what "pediatric short stature" is?** | 115(29.11) | 188(47.59) | 92(23.29) |
| **K2.** **Do you know what a growth chart is and how to read it?** | 161(40.76) | 153(38.73) | 81(20.51) |
| **K3.** **Do you know what bone age is?** | 130(32.91) | 182(46.08) | 83(21.01) |
| **K4.** **There are many causes of pediatric short stature. Are you aware of the following common causes?** | **Never heard of it** | **Know a little about it** | **Know all of the above** |
| **K4.1 Endocrine hormone secretion abnormalities, such as insufficient growth hormone secretion, hypothyroidism, precocious puberty, or excessive adrenal corticosteroid secretion.** | 152(38.48) | 184(46.58) | 59(14.94) |
| **K4.2 Skeletal development disorders, including achondroplasia or osteogenesis imperfecta.** | 127(32.15) | 206(52.15) | 62(15.7) |
| **K4.3 Malnutrition or metabolic disorders due to chronic illnesses, malnutrition, diabetes insipidus, or diabetes.** | 122(30.89) | 211(53.42) | 62(15.7) |
| **K4.4 Mental disorders: Recent studies suggest that mental disorders can affect height, also known as psychosocial dwarfism.** | 203(51.39) | 141(35.7) | 51(12.91) |
| **K4.5 Chromosomal abnormalities, such as Down syndrome or Turner syndrome.** | 184(46.58) | 151(38.23) | 60(15.19) |
|  | **True** | **False** | **Unsure** |
| **K5.** **If pediatric short stature is not diagnosed and treated in time, it may affect a child's physical functions and psychological health.** | 127(32.15) | 194(49.11) | 74(18.73) |
| **K6.** **Diagnosing short stature requires comprehensive physical exams, blood tests, and imaging studies.** | 152(38.48) | 170(43.04) | 73(18.48) |
| **K7.** **For short stature with identified causes, treatment should address the underlying cause. For idiopathic short stature, growth hormone therapy is one effective method to stimulate growth hormone secretion and promote growth.** | 155(39.24) | 181(45.82) | 59(14.94) |
| **K8.** **Pediatric short stature refers to a height that is more than one standard deviation below the average height of healthy children of the same age, sex, and ethnicity, or below the 2nd percentile.** | 123(31.14) | 27(6.84) | 245(62.03) |
| **K9.** **If the cause of short stature is unknown, it is called idiopathic short stature.** | 147(37.22) | 20(5.06) | 228(57.72) |
| **K10.** **Sleep is closely related to children’s growth and development.** | 298(75.44) | 4(1.01) | 93(23.54) |

**Table S2. Distribution of attitude dimension responses**

| **Attitude** | **Strongly agree** | **Agree** | **Neutral** | **Disagree** | **Strongly disagree** |
| --- | --- | --- | --- | --- | --- |
| **A1.My level of concern about my child’s height:** | 188(47.59) | 128(32.41) | 71(17.97) | 6(1.52) | 2(0.51) |
| **A2.I believe it is very important for children to maintain a normal height level:** | 236(59.75) | 102(25.82) | 52(13.16) | / | 5(1.27) |
| **A3.Short stature does not affect a child's character or intelligence. We should focus more on the child’s inner qualities:** | 119(30.13) | 81(20.51) | 104(26.33) | 48(12.15) | 43(10.89) |
| **A4.Short stature may result from acquired factors as well as congenital ones. Therefore, if a child has short stature, parents should actively identify the causes and seek improvement:** | 226(57.22) | 101(25.57) | 55(13.92) | 7(1.77) | 6(1.52) |
| **A5.Parental genes are one of the factors affecting a child's height. If my child has short stature, I would feel very guilty:** | 144(36.46) | 103(26.08) | 99(25.06) | 31(7.85) | 18(4.56) |
| **A6.Short children may face rejection and discrimination from peers, affecting their social and emotional development. Therefore, parents should pay attention, seek timely treatment, and provide encouragement:** | 233(58.99) | 99(25.06) | 51(12.91) | 2(0.51) | 10(2.53) |
| **A7.Ensuring adequate sleep is essential for preventing short stature:** | 254(64.3) | 92(23.29) | 41(10.38) | 3(0.76) | 5(1.27) |
| **A8.Short stature in children is mainly due to calcium and zinc deficiencies. Nutritional supplementation alone is sufficient, and there is no need for hospital examinations:** | 73(18.48) | 55(13.92) | 92(23.29) | 91(23.04) | 84(21.27) |
| **A9.During a child’s growth and development, parents should focus on nutrition and exercise to provide an environment conducive to growth:** | 238(60.25) | 102(25.82) | 47(11.9) | 3(0.76) | 5(1.27) |
| **A10.During a child’s growth and development, parents should also pay attention to the child’s mental health:** | 264(66.84) | 89(22.53) | 36(9.11) | 2(0.51) | 4(1.01) |
| **A11.Parents should understand some knowledge about short stature to identify if their child’s height is within a normal range:** | 217(54.94) | 117(29.62) | 52(13.16) | 3(0.76) | 6(1.52) |

**Table S3. Distribution of practice dimension responses**

| **Practice** | **Strongly agree** | **Agree** | **Neutral** | **Disagree** | **Strongly disagree** |
| --- | --- | --- | --- | --- | --- |
| **P1.** **I regularly measure my child’s height to monitor their growth:** | 184(46.58) | 117(29.62) | 80(20.25) | 6(1.52) | 8(2.03) |
| **P2.** **If my child is significantly shorter than peers of the same age, I would take them to a doctor for consultation:** | 191(48.35) | 120(30.38) | 68(17.22) | 10(2.53) | 6(1.52) |
| **P3.** **My child’s daily outdoor activity time is:** |  |  |  |  |  |
| 1. <30 minutes | 69(17.47) |  |  |  |  |
| 1. 30-59 minutes | 114(28.86) |  |  |  |  |
| 1. 1-2 hours | 133(33.67) |  |  |  |  |
| 1. ＞2 hours | 46(11.65) |  |  |  |  |
| 1. Unsure | 33(8.35) |  |  |  |  |
| **P4.** **I focus on my child’s nutrition, ensuring a diverse and balanced diet that provides essential nutrients:** | 160(40.51) | 134(33.92) | 87(22.03) | 7(1.77) | 7(1.77) |
| **P5.** **I pay attention to my child’s sleep quality and duration:** | 188(47.59) | 137(34.68) | 58(14.68) | 5(1.27) | 7(1.77) |
| **P6.** **I adopt a calm and rational attitude towards my child’s height issues to avoid causing them stress or anxiety:** | 188(47.59) | 131(33.16) | 59(14.94) | 11(2.78) | 6(1.52) |
| **P7.** **I actively seek knowledge about normal growth and development and short stature in children:** | 150(37.97) | 122(30.89) | 99(25.06) | 12(3.04) | 12(3.04) |
| **P8.** **Through which channels do you learn about short stature? (Multiple selections allowed):** |  |  |  |  |  |
| 1. Relatives and friends | 179(45.32) |  |  |  |  |
| 1. Healthcare professionals | 230(58.23) |  |  |  |  |
| 1. Internet (webpages, WeChat, etc.) | 259(65.57) |  |  |  |  |
| 1. Television | 170(43.04) |  |  |  |  |
| 1. Radio | 83(21.01) |  |  |  |  |
| 1. Magazines and newspapers | 82(20.76) |  |  |  |  |
| 1. Have never actively sought information | 59(14.94) |  |  |  |  |
| 1. Other (please specify) | 39(9.87) |  |  |  |  |

**Table S3. SEM fit indices**

| Indicators | Reference | Results |
| --- | --- | --- |
| RMSEA | <0.08 Good | 0.057 |
| SRMR | <0.08 Good | 0.069 |
| TLI | >0.8 Good | 0.934 |
| CFI | >0.8 Good | 0.941 |

**Table S4. SEM total effect coefficient estimates**

|  |  | Estimate | P>|z| |
| --- | --- | --- | --- |
| **Structural** |  |  |  |
| Attitude |  |  |  |
|  | Knowledge | 0.163 | <0.001 |
| Practice |  |  |  |
|  | Attitude | 1.429 | <0.001 |
|  | Knowledge | 0.196 | <0.001 |
| Measurement | |  |  |
| K1 | Knowledge | 1 |  |
| K2 | Knowledge | 1.097 | <0.001 |
| K3 | Knowledge | 1.060 | <0.001 |
| K4_1 | Knowledge | 1.045 | <0.001 |
| K4_2 | Knowledge | 1.077 | <0.001 |
| K4_3 | Knowledge | 1.140 | <0.001 |
| K4_4 | Knowledge | 1.066 | <0.001 |
| K4_5 | Knowledge | 1.196 | <0.001 |
| K5 | Knowledge | 1.194 | <0.001 |
| K6 | Knowledge | 1.248 | <0.001 |
| K7 | Knowledge | 1.146 | <0.001 |
| K8 | Knowledge | -0.563 | <0.001 |
| K9 | Knowledge | -0.762 | <0.001 |
| K10 | Knowledge | -0.499 | <0.001 |
| A1 | Attitude | 1 |  |
| A2 | Attitude | 1.474 | <0.001 |
| A3 | Attitude | -0.425 | 0.014 |
| A4 | Attitude | 1.796 | <0.001 |
| A5 | Attitude | -1.263 | <0.001 |
| A6 | Attitude | 1.765 | <0.001 |
| A7 | Attitude | 1.757 | <0.001 |
| A8 | Attitude | -0.137 | 0.443 |
| A9 | Attitude | 1.808 | <0.001 |
| A10 | Attitude | 1.664 | <0.001 |
| A11 | Attitude | 1.812 | <0.001 |
| P1 | Practice | 1 |  |
| P2 | Practice | 1.008 | <0.001 |
| P4 | Practice | 0.949 | <0.001 |
| P5 | Practice | 0.969 | <0.001 |
| P6 | Practice | 0.991 | <0.001 |
| P7 | Practice | 1.058 | <0.001 |
